# Supplementary material for: Synthesis and Characterization of Dendronized Gold Nanoparticles Bearing Charged Peripheral Groups with Antimicrobial Potential
Source: MDPI journal article supplement (doi:10.3390/nano12152610), 2022-07-29
Supplement: s1 [file s1]

# Synthesis and Characterization of Dendronized Gold Nanoparticles Bearing Charged Peripheral Groups with Antimicrobial Potential

Gabriel Perli <sup>1</sup>, Diego L. Bertuzzi <sup>1</sup>, Dênio E. P. Souto <sup>1,2</sup>, Miguel D. Ramos <sup>1</sup>, Carolyne B. Braga <sup>1</sup>, Samile B. Aguiar <sup>1</sup> and Catia Ornelas <sup>1,\*</sup>

<sup>1</sup> Institute of Chemistry, University of Campinas, Campinas 13083-970, SP, Brazil; perligabriel@gmail.com (G.P.); diego.bertuzzi@hotmail.com (D.L.B.); denio.souto@ufpr.br (D.E.P.S.); migueljr.qma@gmail.com (M.D.R.); carolbbraga7@gmail.com (C.B.B.); samilede17@gmail.com (S.B.A.)

<sup>2</sup> Laboratorio de Espectrometria, Sensores e Biosensores, Departamento de Quimica, Universidade Federal do Paraná (UFPR), Curitiba 81531-980, PR, Brazil

\* Correspondence: catiaornelas@catiaornelaslab.com

## 1. NMR and Mass Spectra for all Compounds

### 1.2. Compound 2

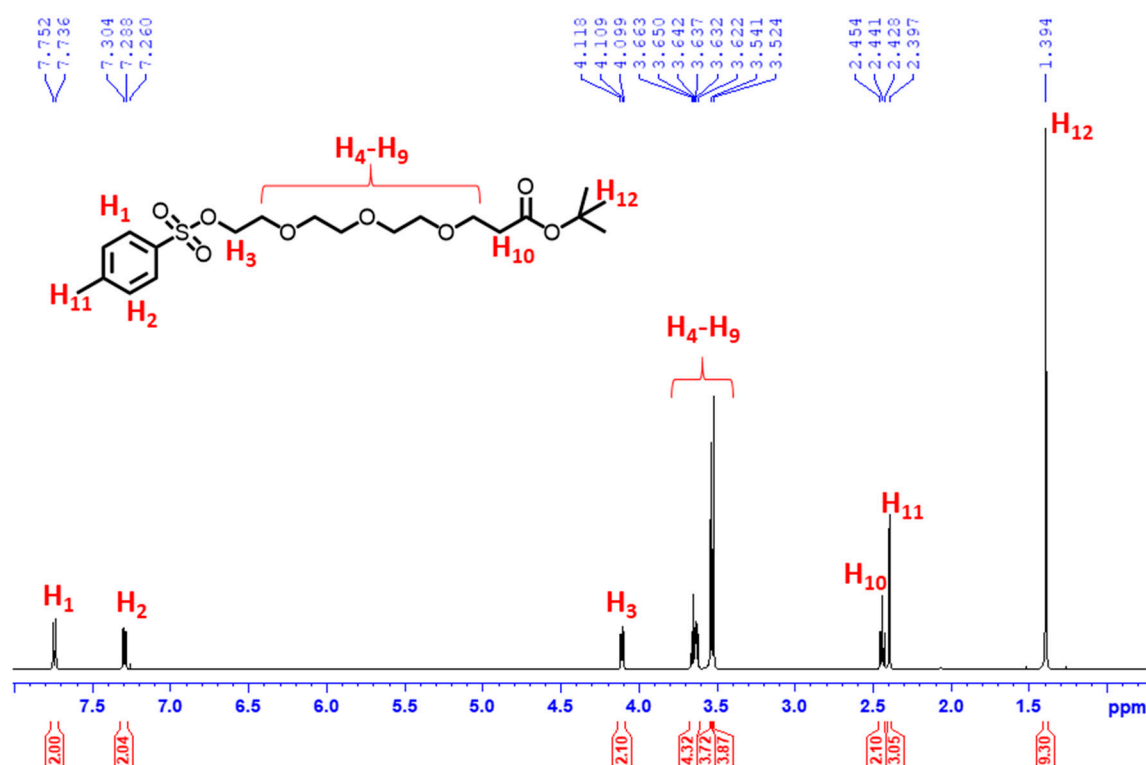

Figure S1. <sup>1</sup>H NMR spectrum of compound 2 (500 MHz, CDCl<sub>3</sub>, 25 °C).

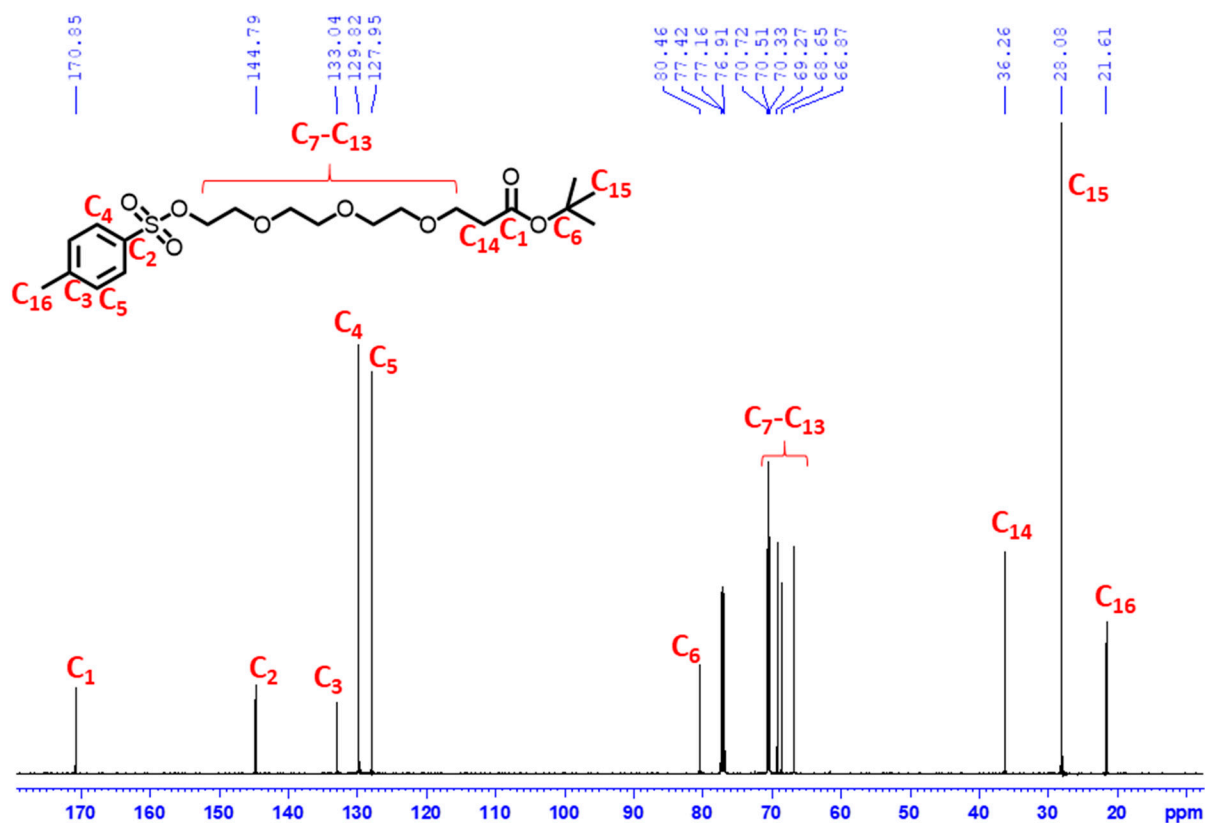

**Figure S2.**  $^{13}\text{C}$  NMR spectrum of compound 2 (500 MHz,  $\text{CDCl}_3$ , 25  $^\circ\text{C}$ ).

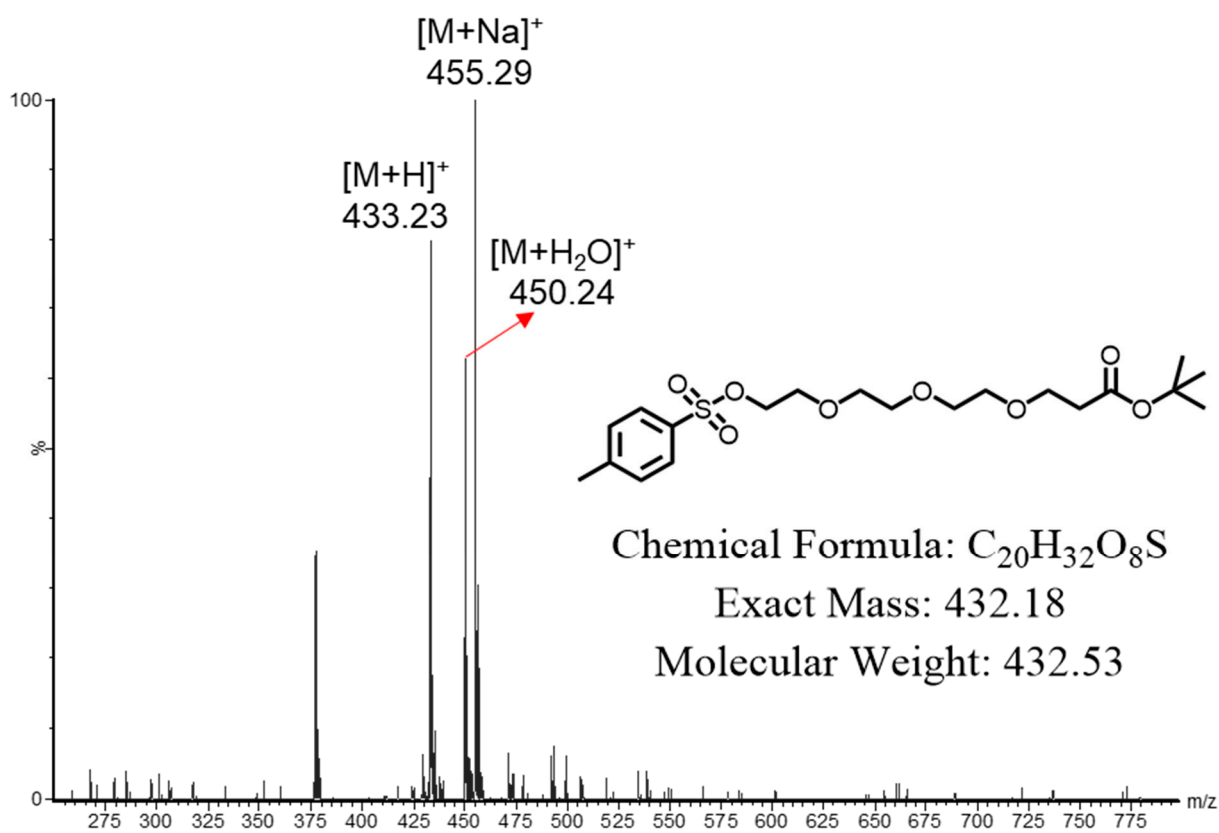

**Figure S3.** ESI-QTOF mass spectrum of compound 2.

### 1.3. Compound 3

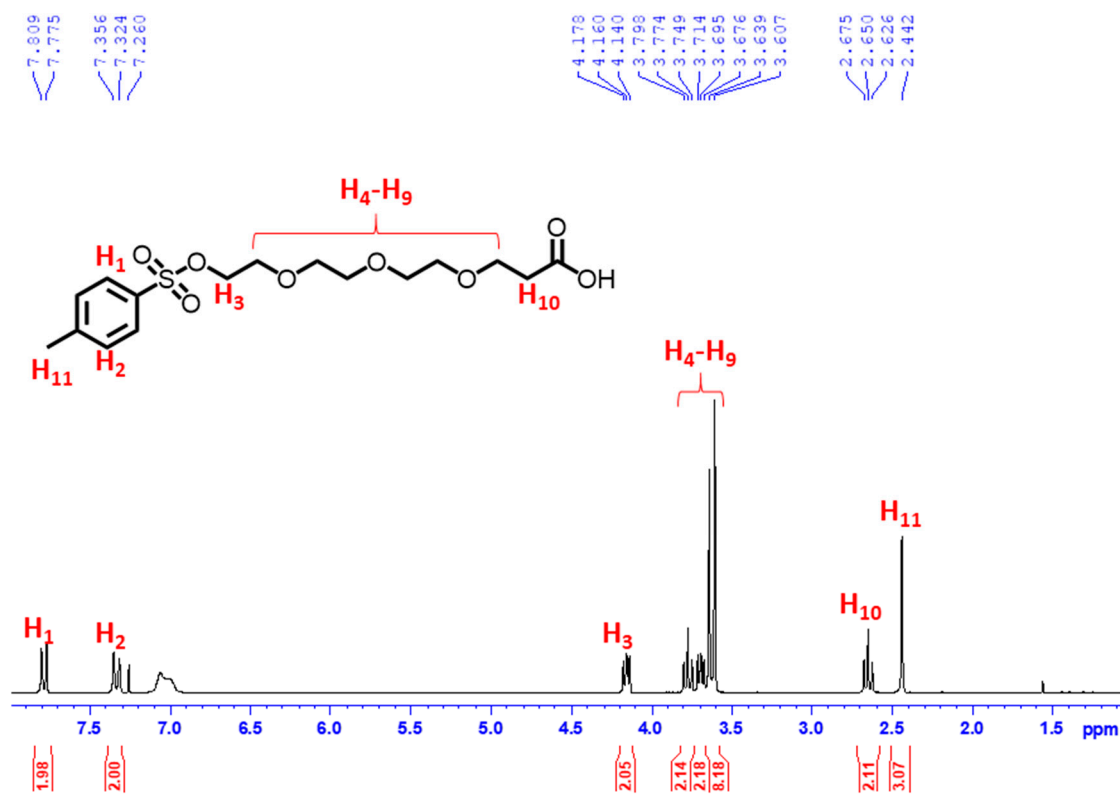

**Figure S4.** <sup>1</sup>H NMR spectrum of compound 3 (500 MHz, CDCl<sub>3</sub>, 25 °C).

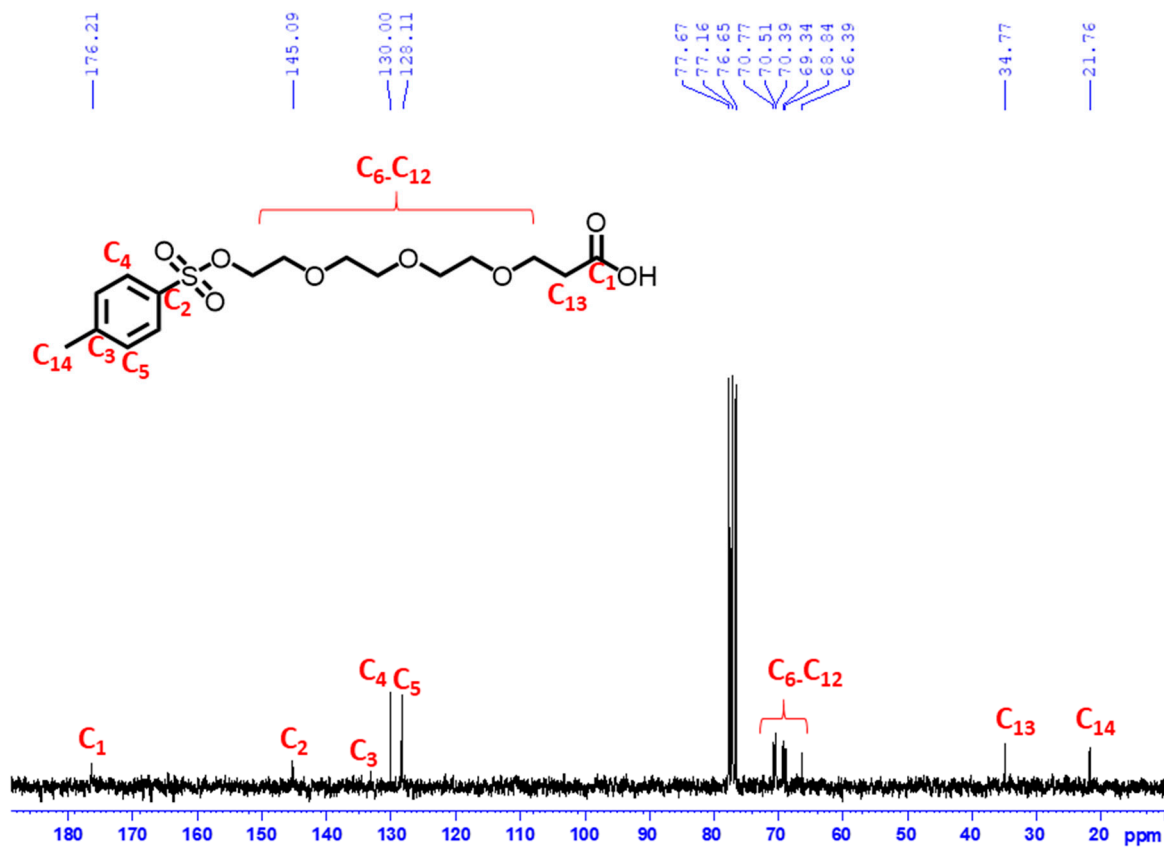

**Figure S5.** <sup>13</sup>C NMR spectrum of compound 3 (500 MHz, CDCl<sub>3</sub>, 25 °C).

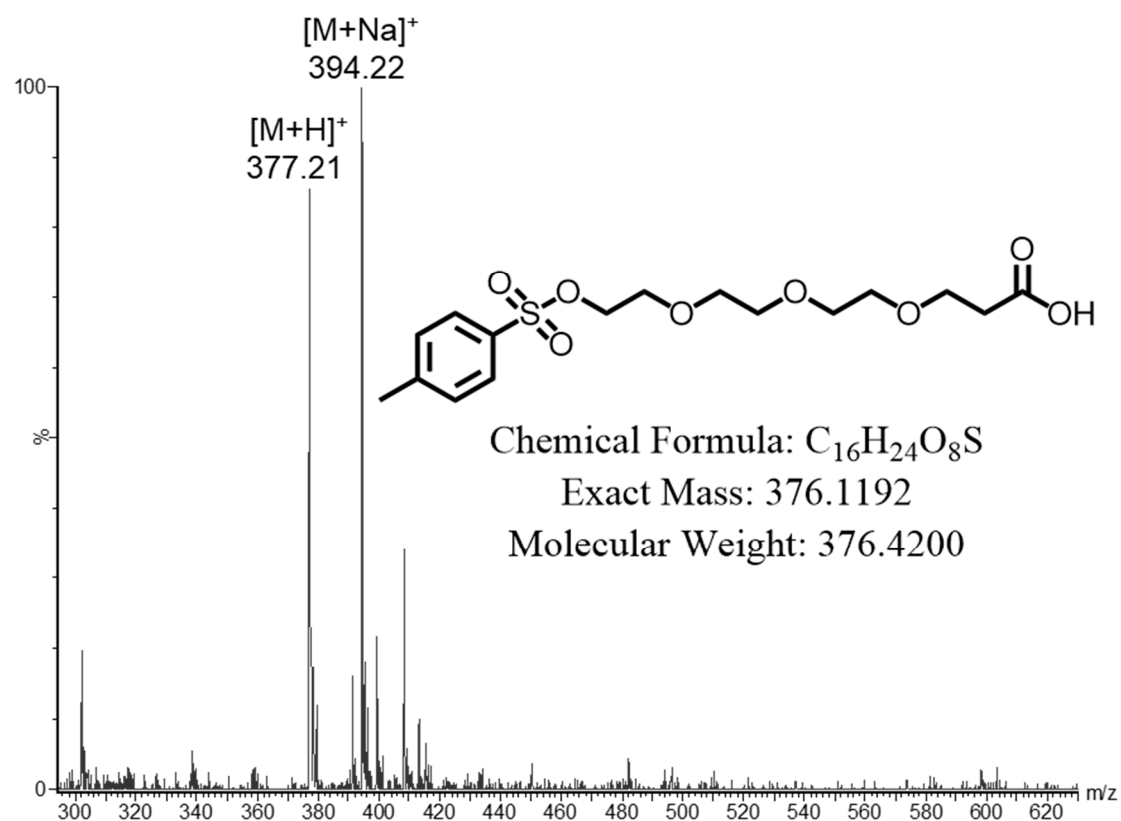

**Figure S6.** ESI-QTOF mass spectrum of compound **3**.

#### 1.4. Compound **4**

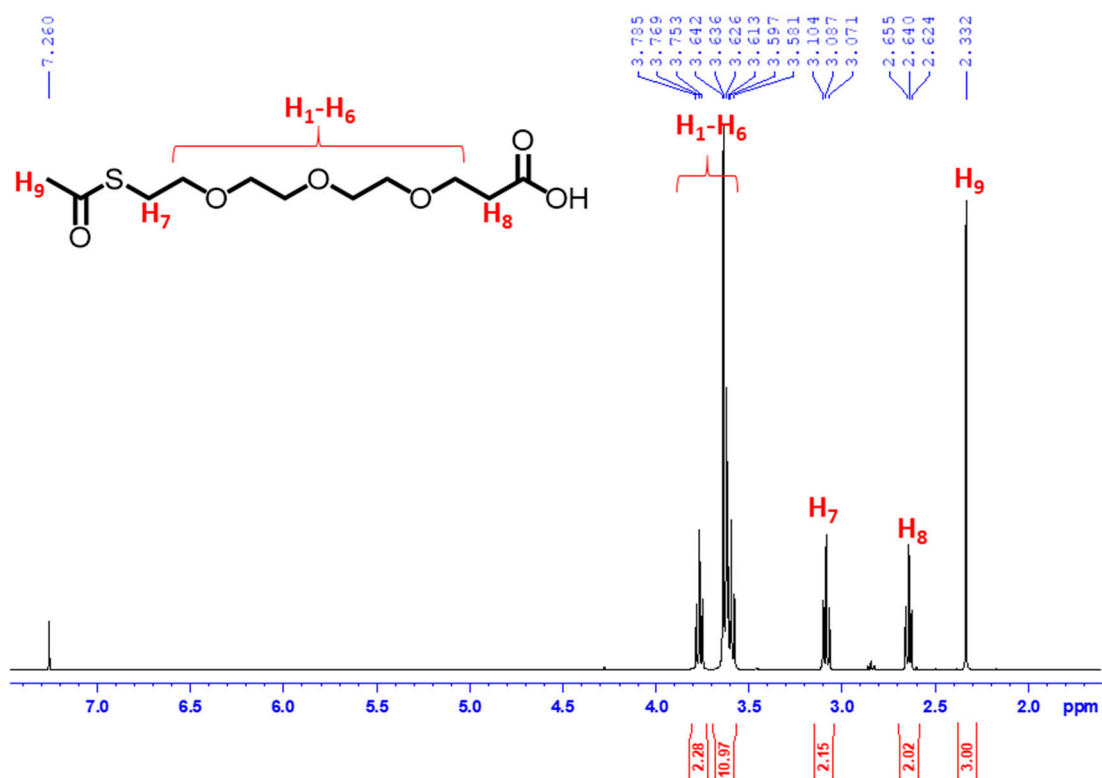

**Figure S7.**  $^1H$  NMR spectrum of compound **4** (500 MHz,  $CDCl_3$ , 25  $^{\circ}C$ ).

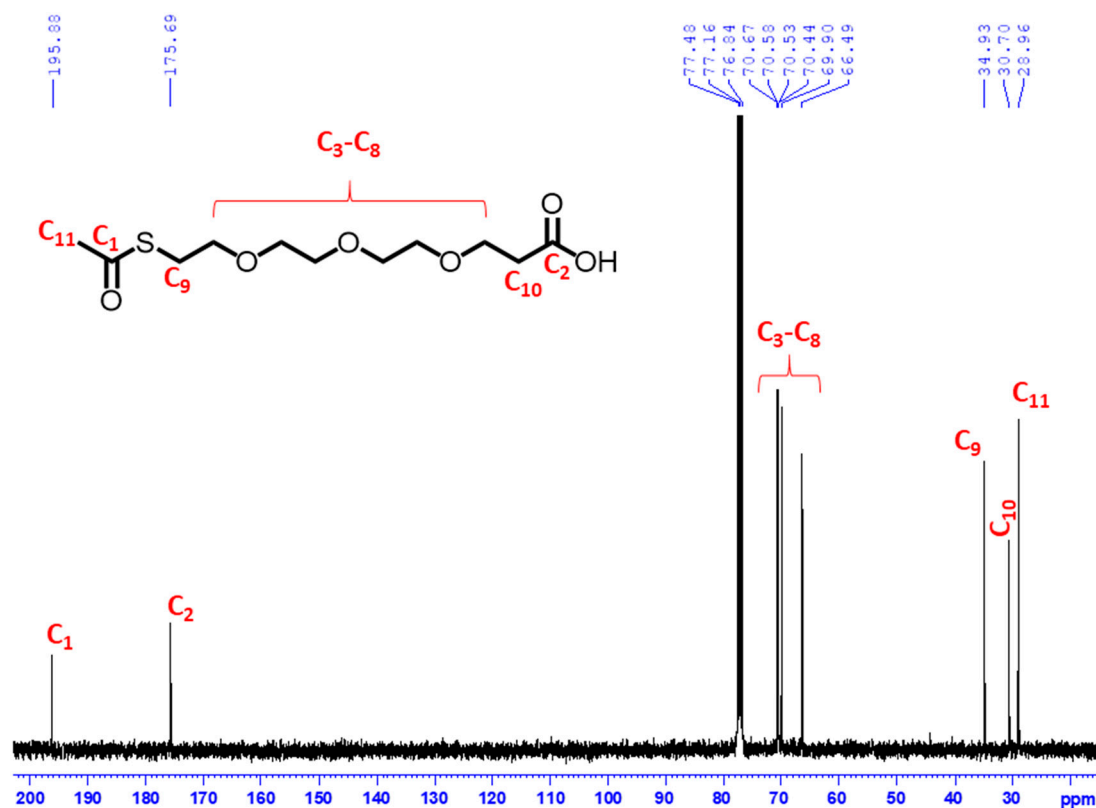

**Figure S8.** <sup>13</sup>C NMR spectrum of compound **4** (500 MHz, CDCl<sub>3</sub>, 25 °C).

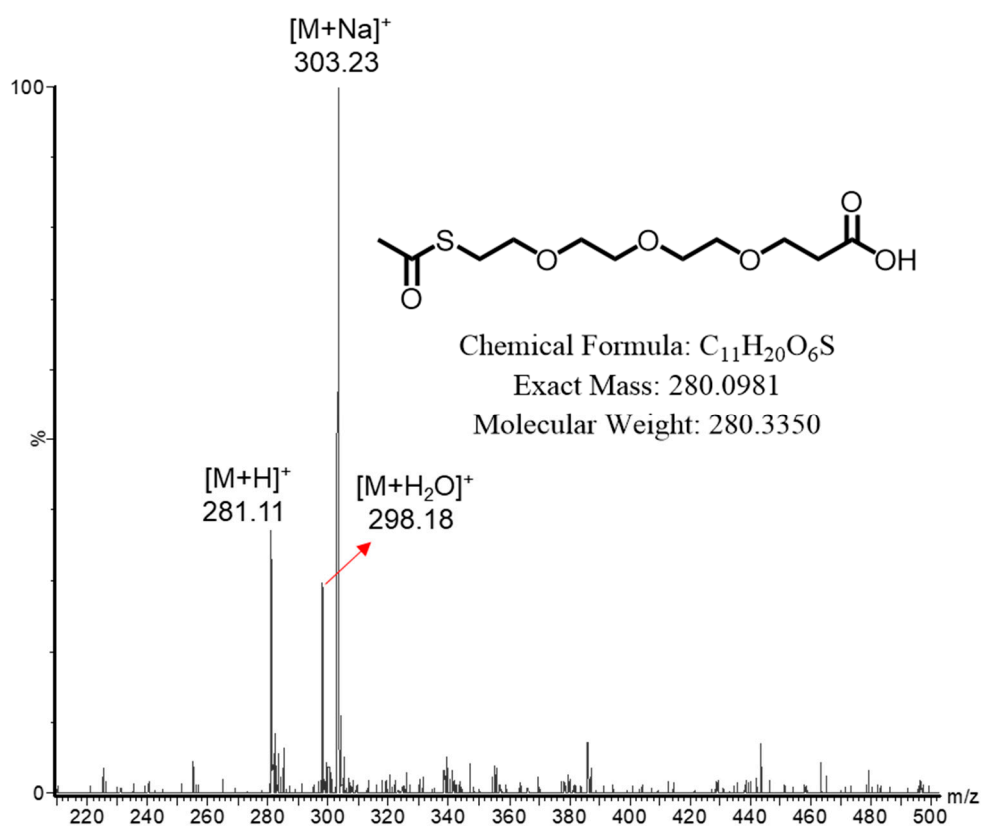

**Figure S9.** ESI-QTOF mass spectrum of compound **4**.

## 1.5. Compound 5

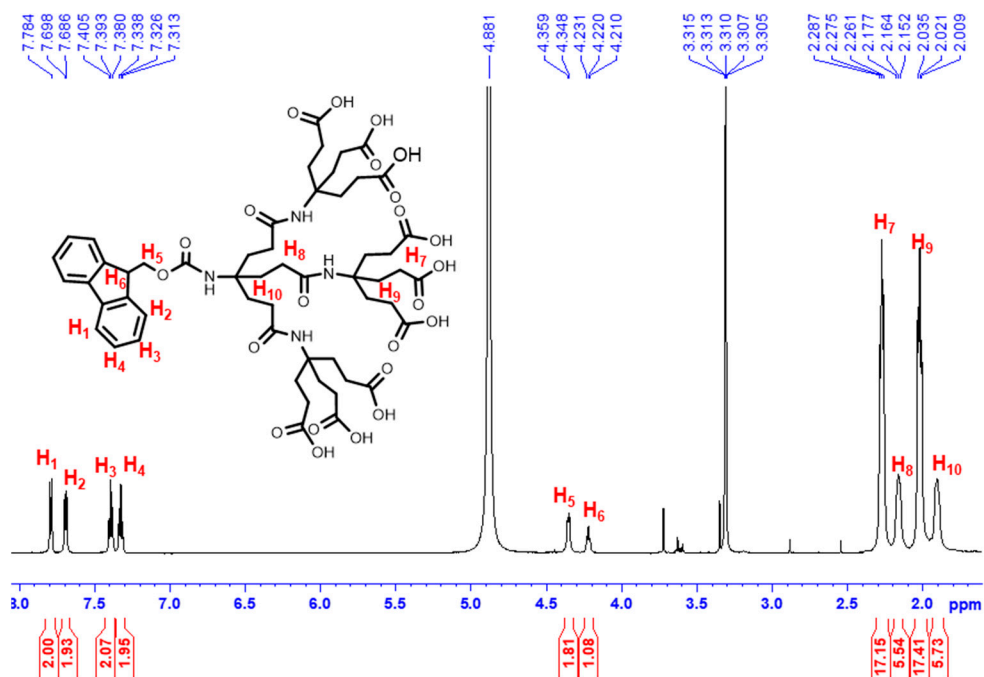

**Figure S10.** <sup>1</sup>H NMR spectrum of compound **5** (600 MHz, MeOD, 25 °C).

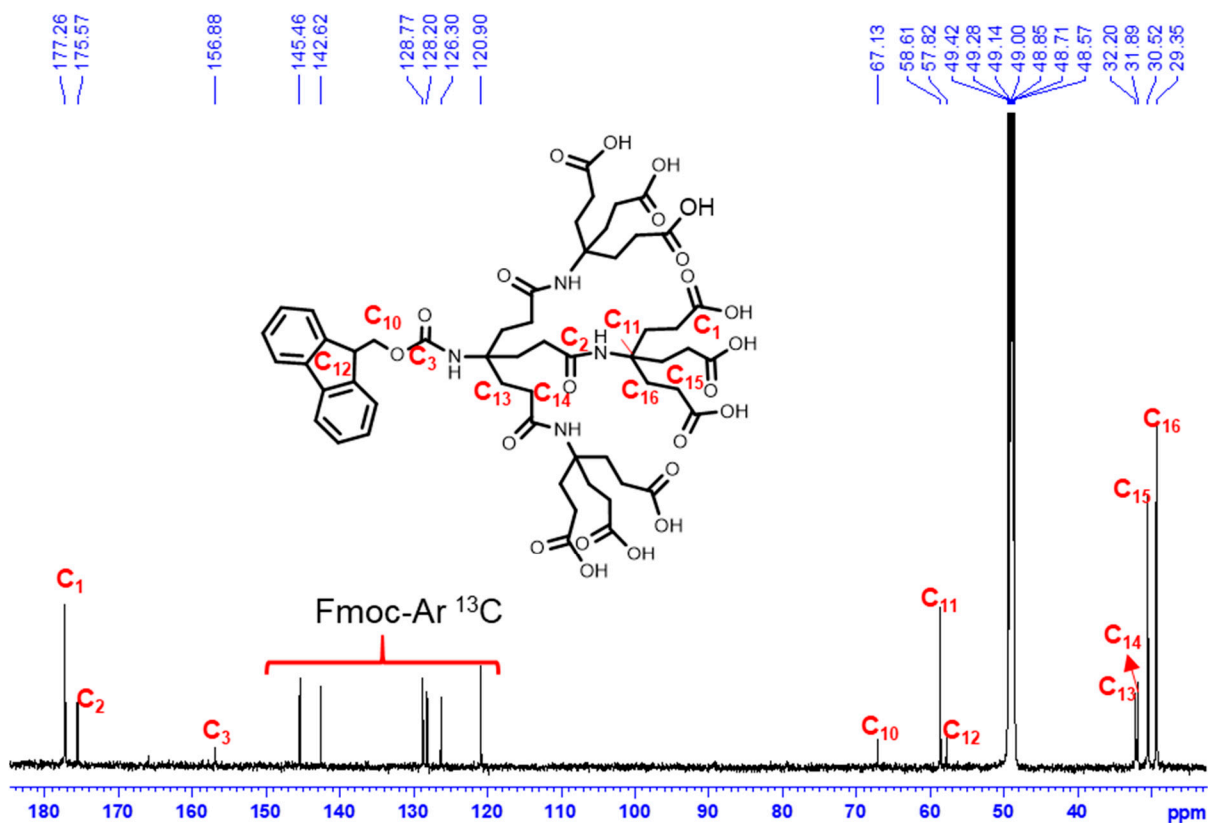

**Figure S11.** <sup>13</sup>C NMR spectrum of compound **5** (600 MHz, MeOD, 25 °C).

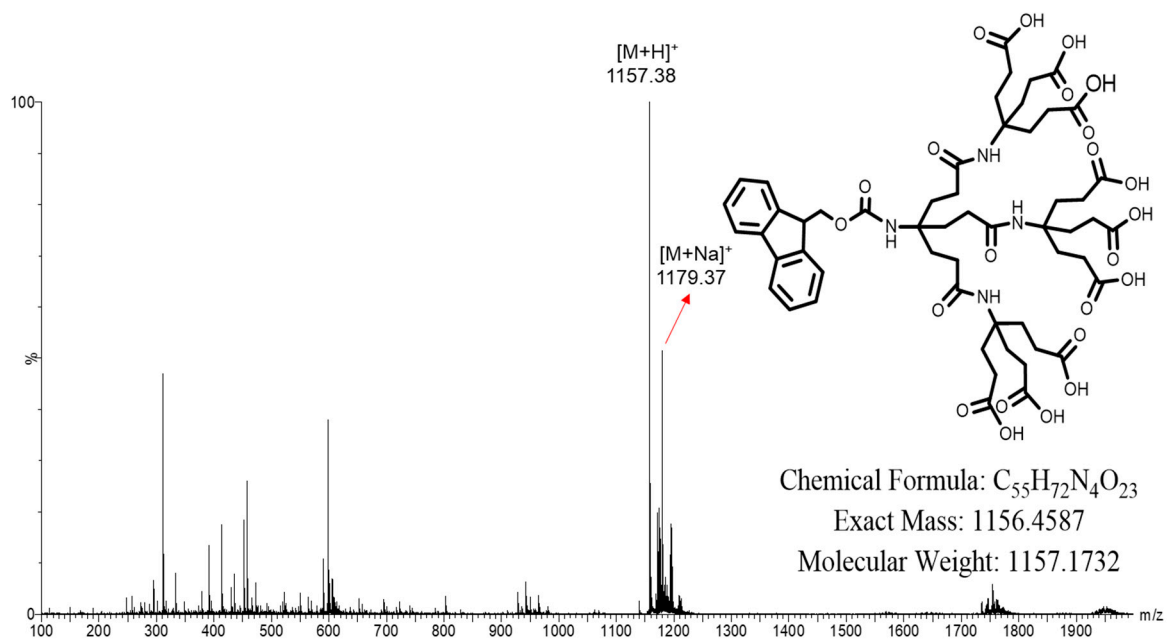

**Figure S12.** ESI-QTOF mass spectrum of compound **5**.

### 1.6. Compound 6

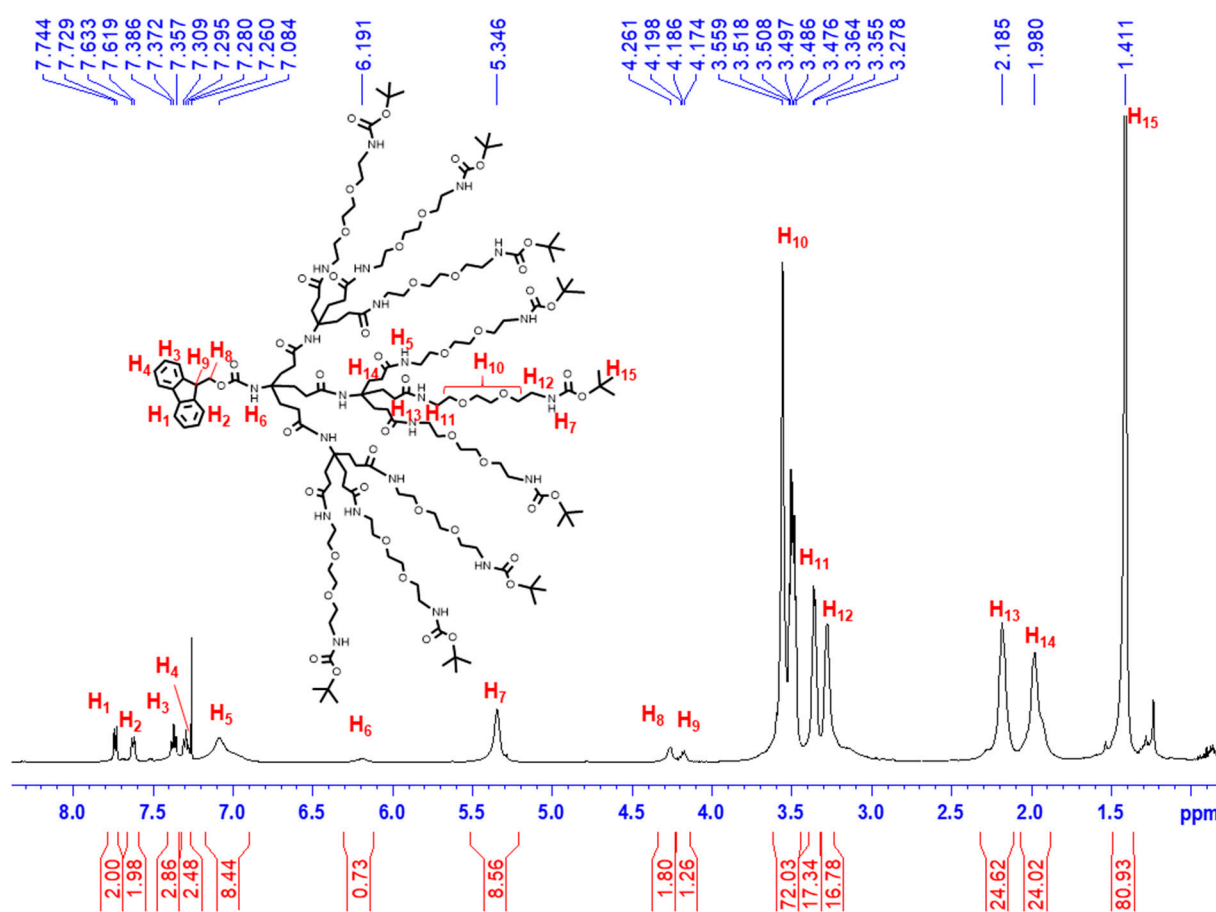

**Figure S13.**  $^1H$  NMR spectrum of compound **6** (600 MHz,  $CDCl_3$ , 25  $^{\circ}C$ ).

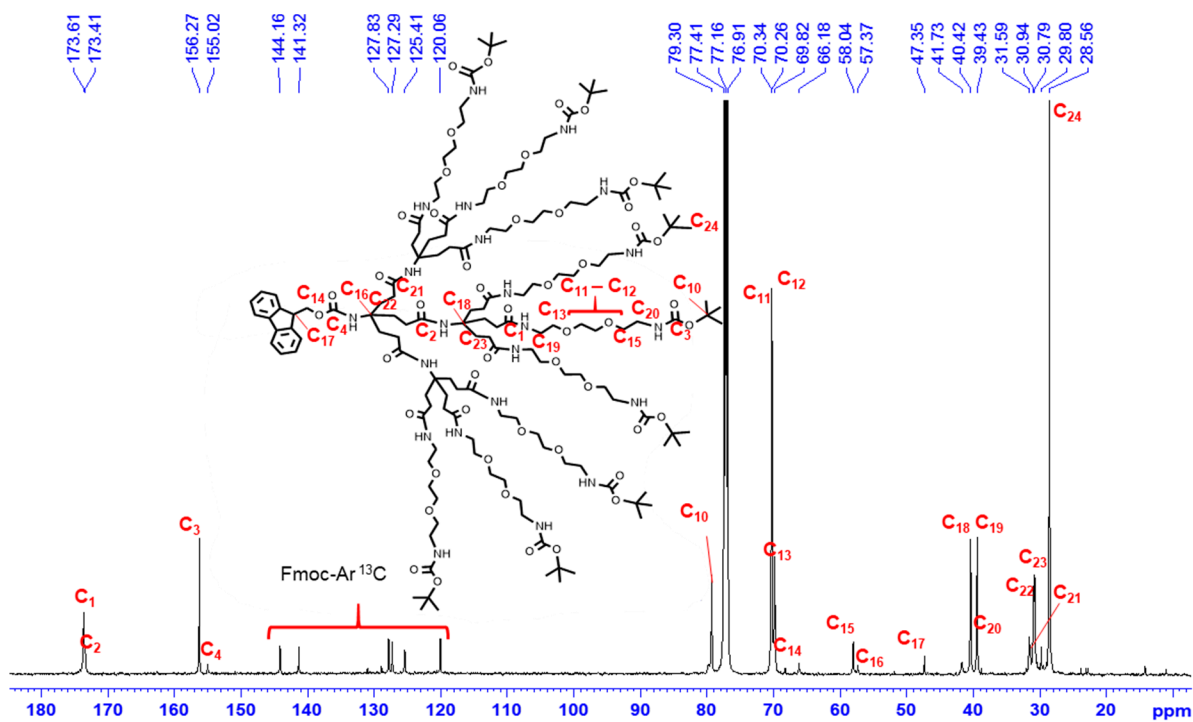

**Figure S14.**  $^{13}\text{C}$  NMR spectrum of compound **6** (600 MHz,  $\text{CDCl}_3$ , 25  $^\circ\text{C}$ ).

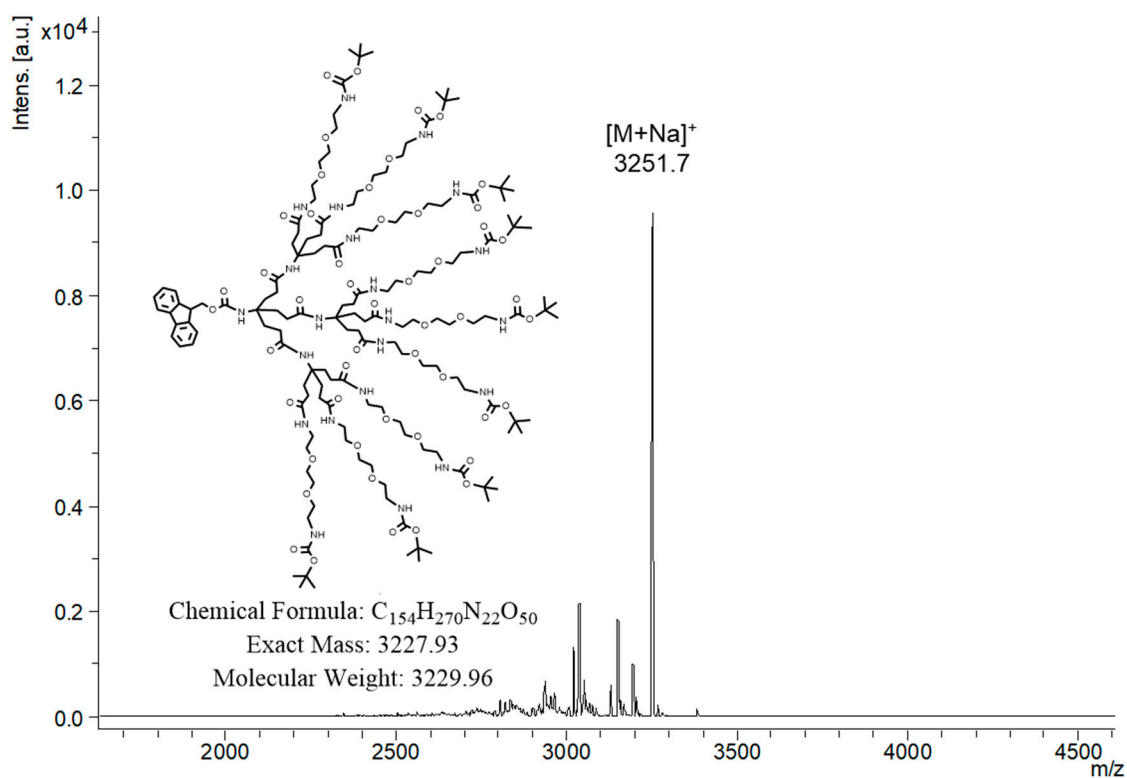

**Figure S15.** MALDI-TOF mass spectrum of compound **6**.



## 1.7. Compound 7

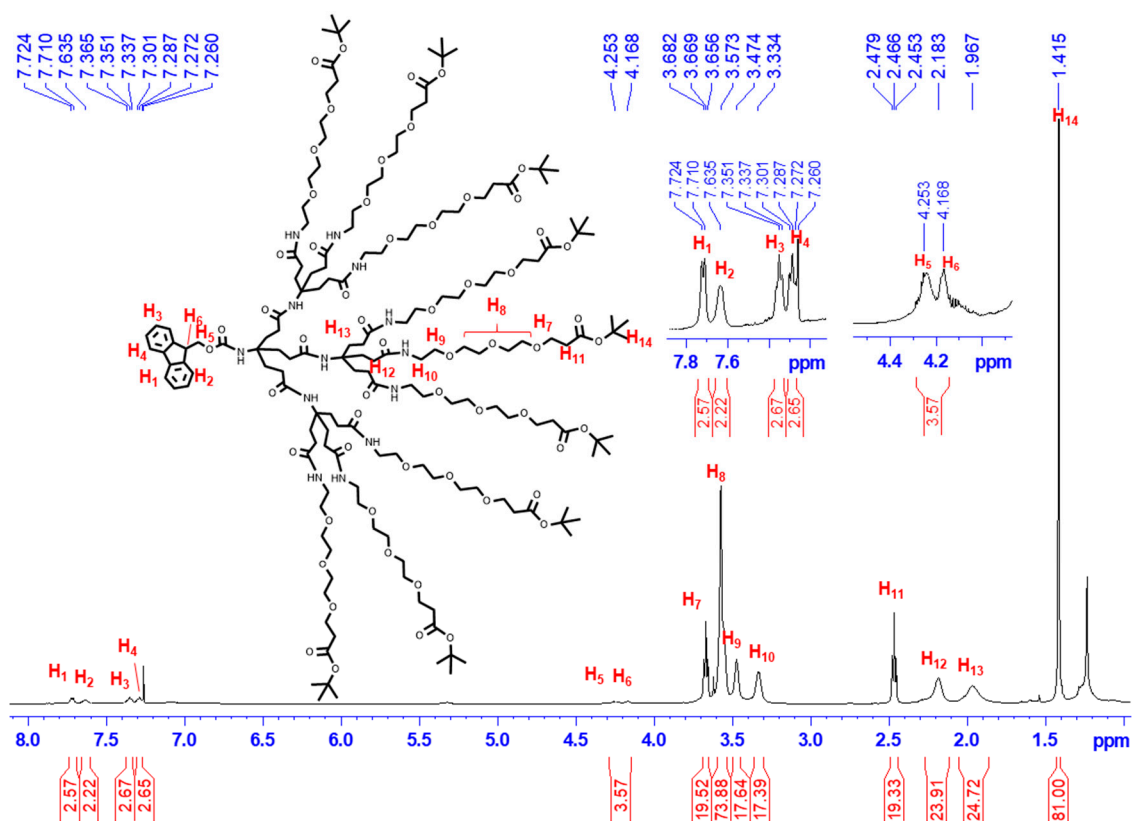

**Figure S16.** <sup>1</sup>H NMR spectrum of compound 7 (600 MHz, CDCl<sub>3</sub>, 25 °C).

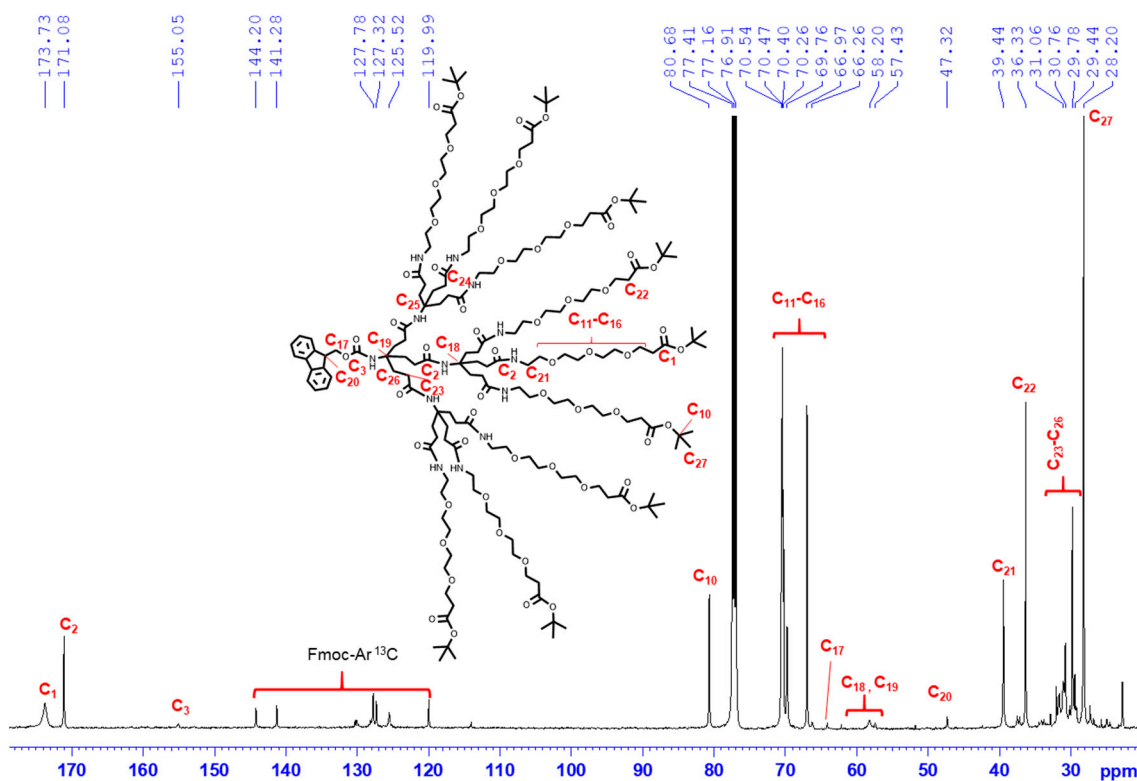

**Figure S17.** <sup>13</sup>C NMR spectrum of compound 7 (600 MHz, CDCl<sub>3</sub>, 25 °C).

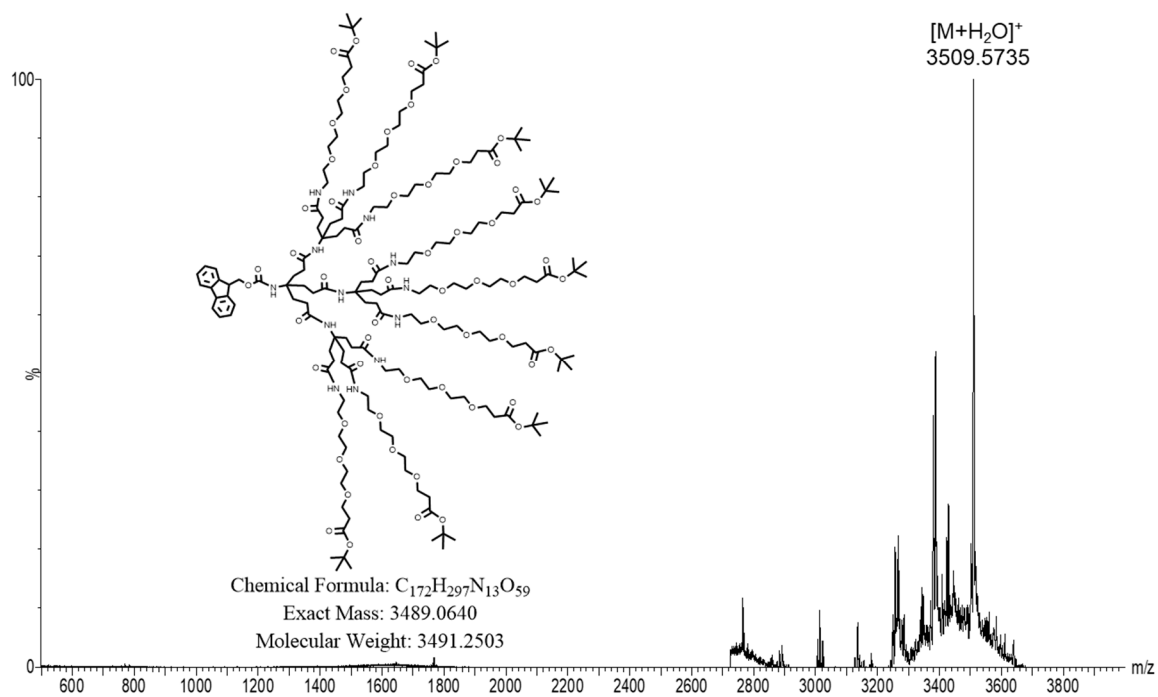

**Figure S18.** MALDI-TOF mass spectrum of compound 7.

### 1.8. Compound 8

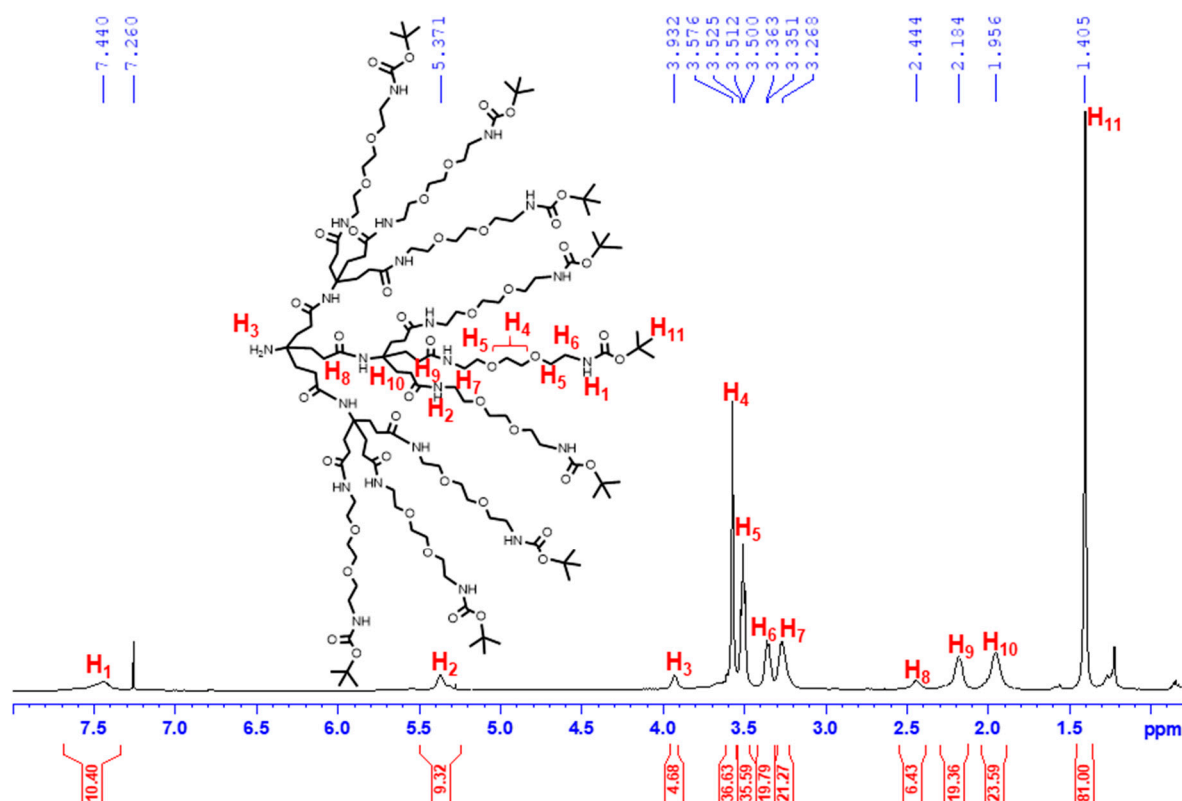

**Figure S19.**  $^1H$  NMR spectrum of compound 8 (600 MHz,  $CDCl_3$ , 25  $^{\circ}C$ ).

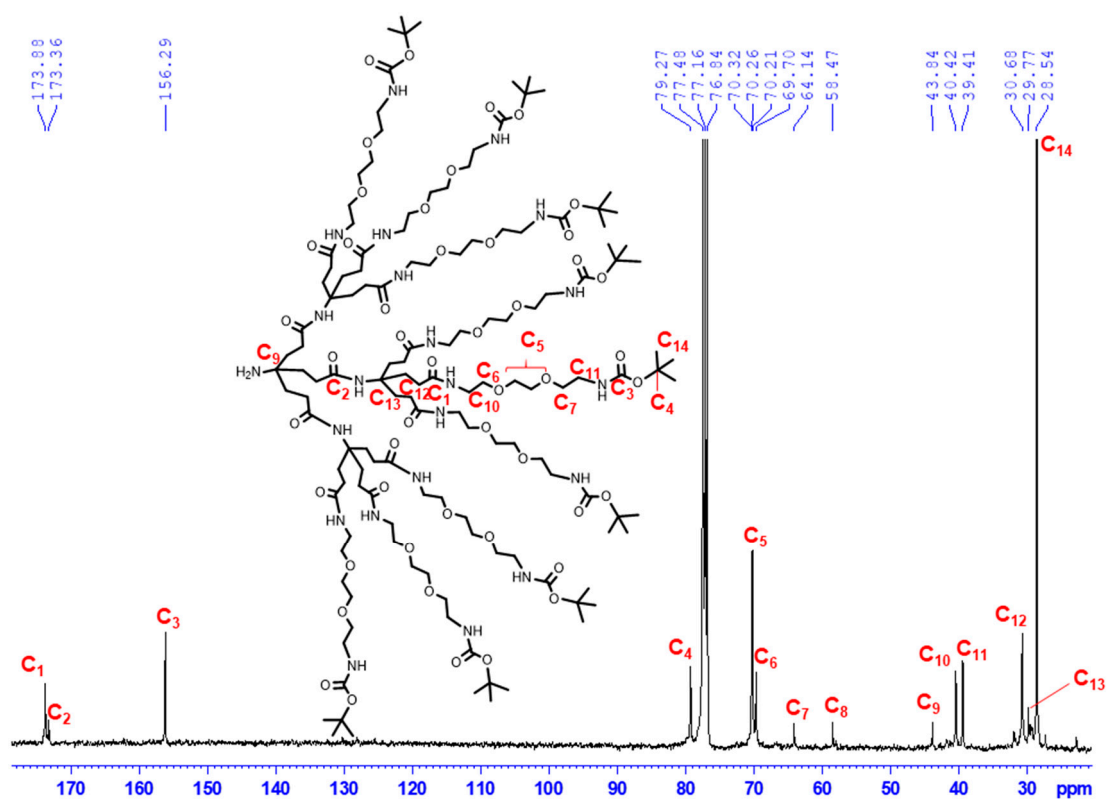

**Figure S20.**  $^1\text{H}$  NMR spectrum of compound **8** (600 MHz,  $\text{CDCl}_3$ , 25  $^\circ\text{C}$ ).

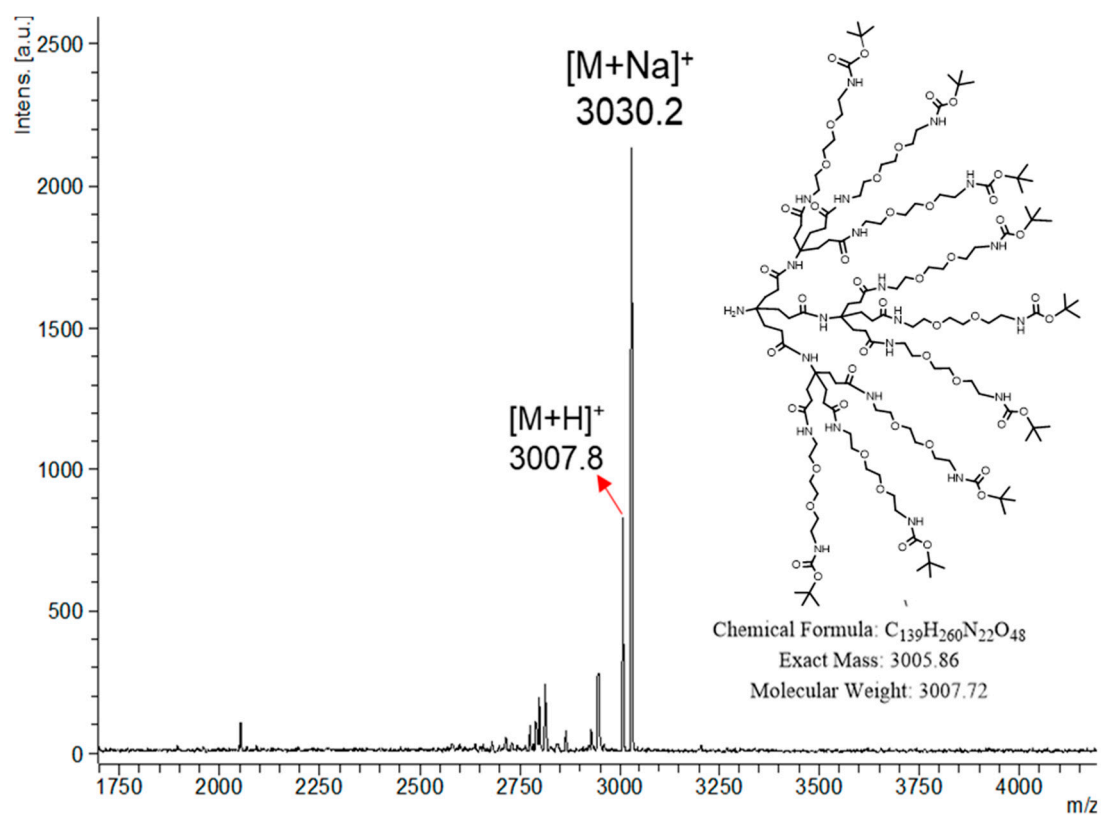

**Figure S21.** ESI-QTOF mass spectrum of compound **8**.

## 1.9. Compound 9

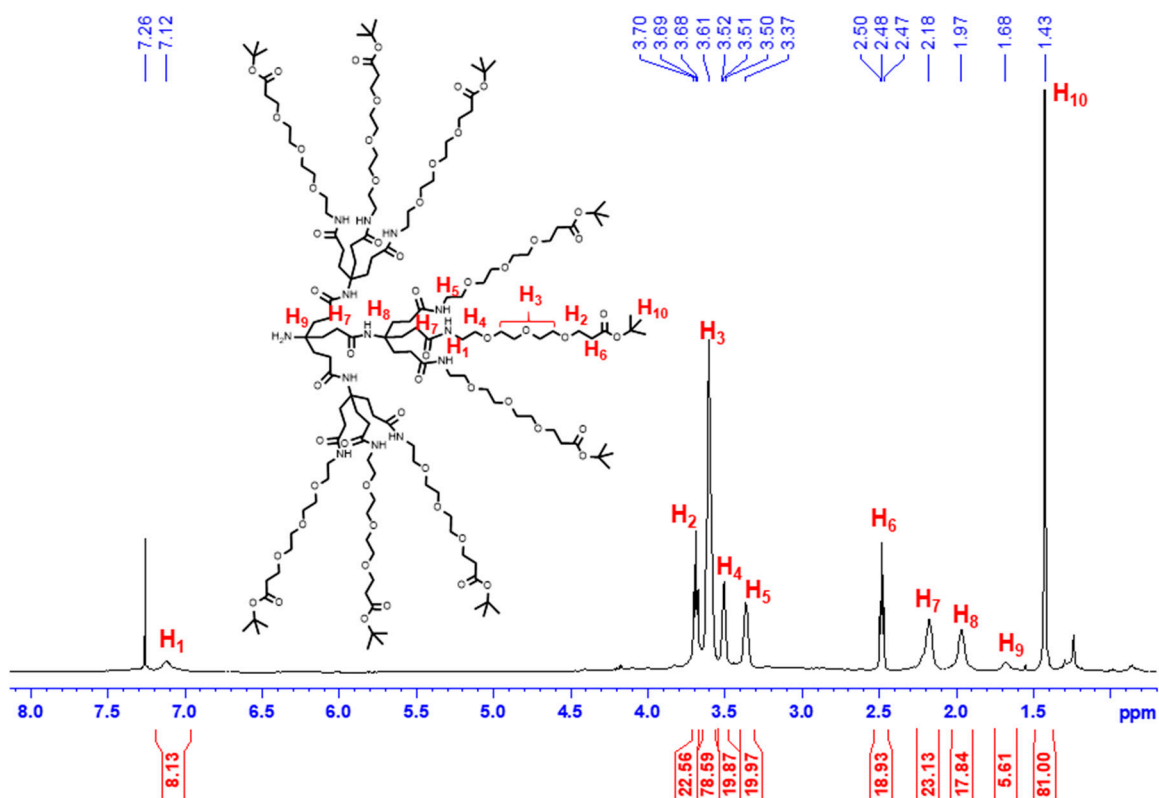

**Figure S22.** <sup>1</sup>H NMR spectrum of compound 9 (600 MHz, CDCl<sub>3</sub>, 25 °C).

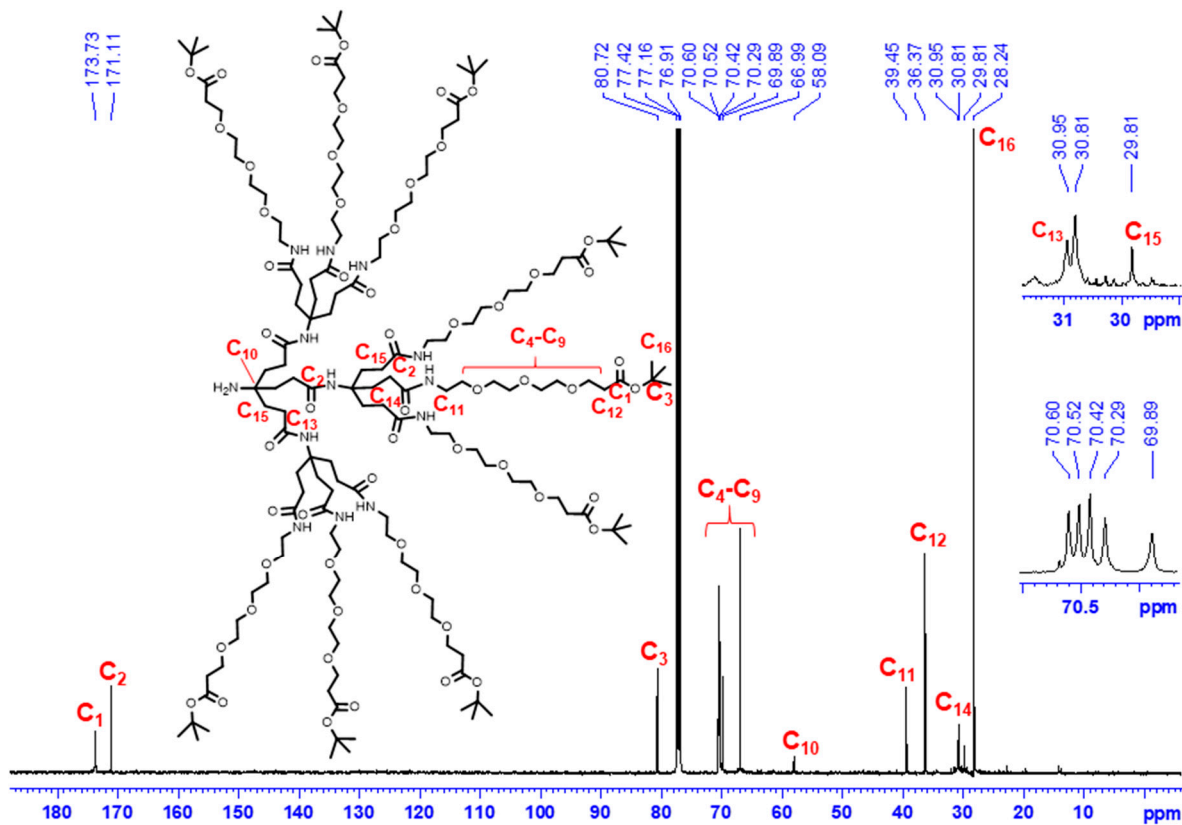

**Figure S23.** <sup>13</sup>C NMR spectrum of compound 9 (600 MHz, CDCl<sub>3</sub>, 25 °C).

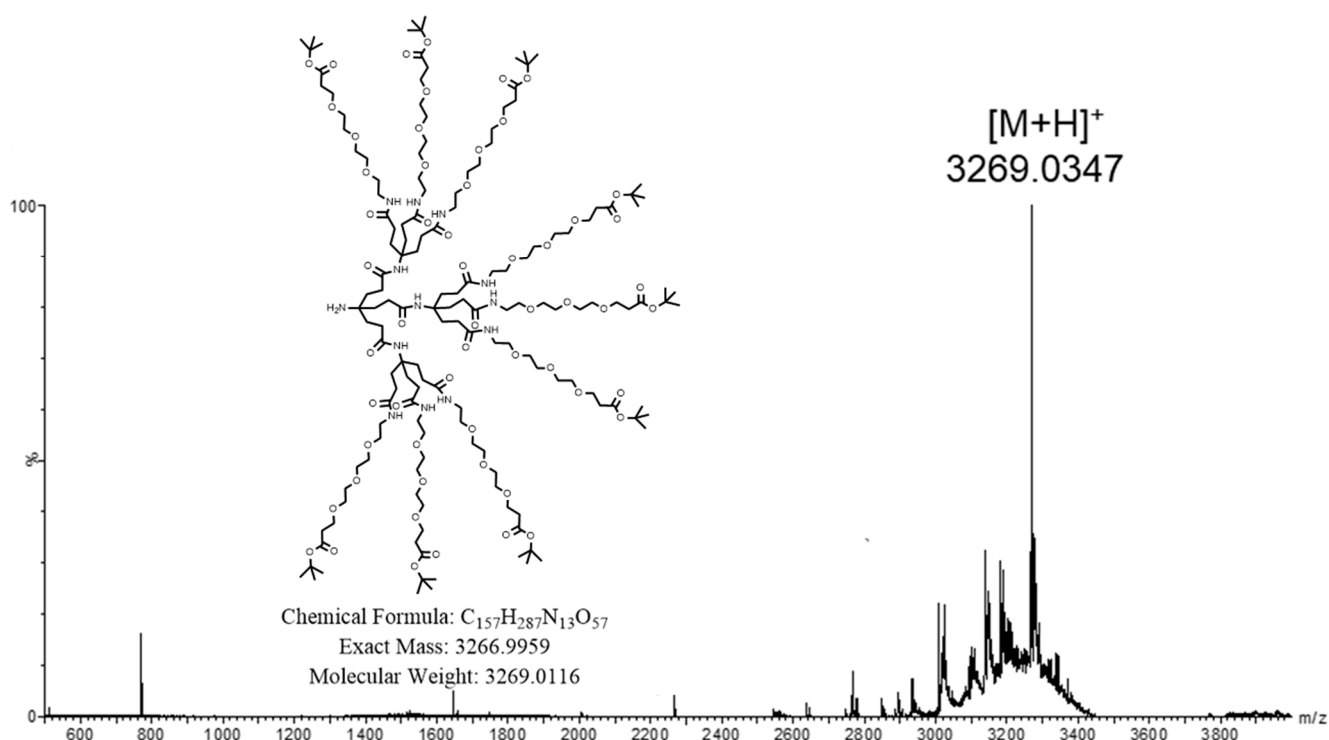

Figure S24. ESI-QTOF mass spectrum of compound **9**.

### 1.10. Compound 10

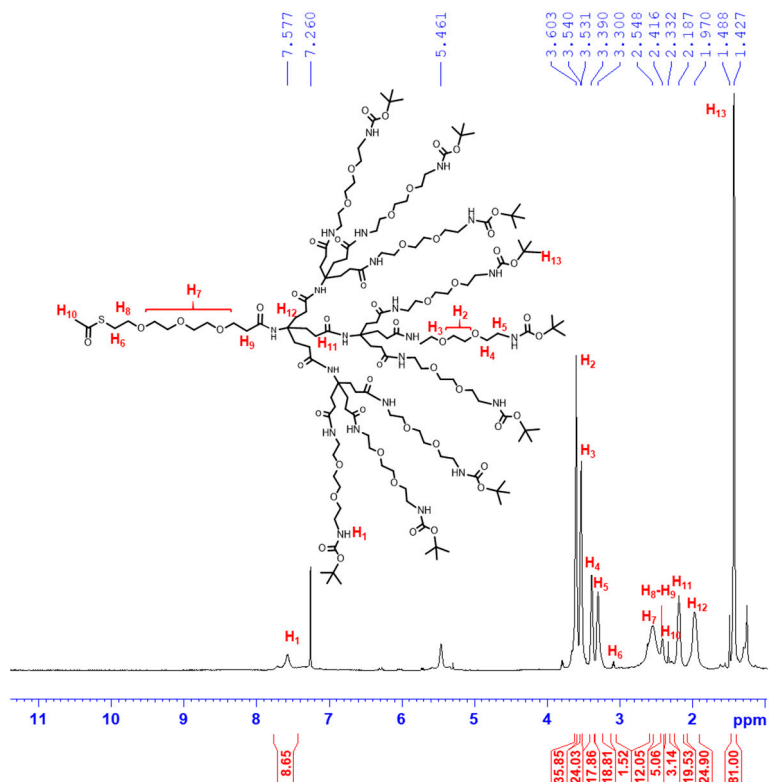

Figure S25.  $^1H$  NMR spectrum of compound **10** (600 MHz,  $CDCl_3$ , 25  $^{\circ}C$ ).

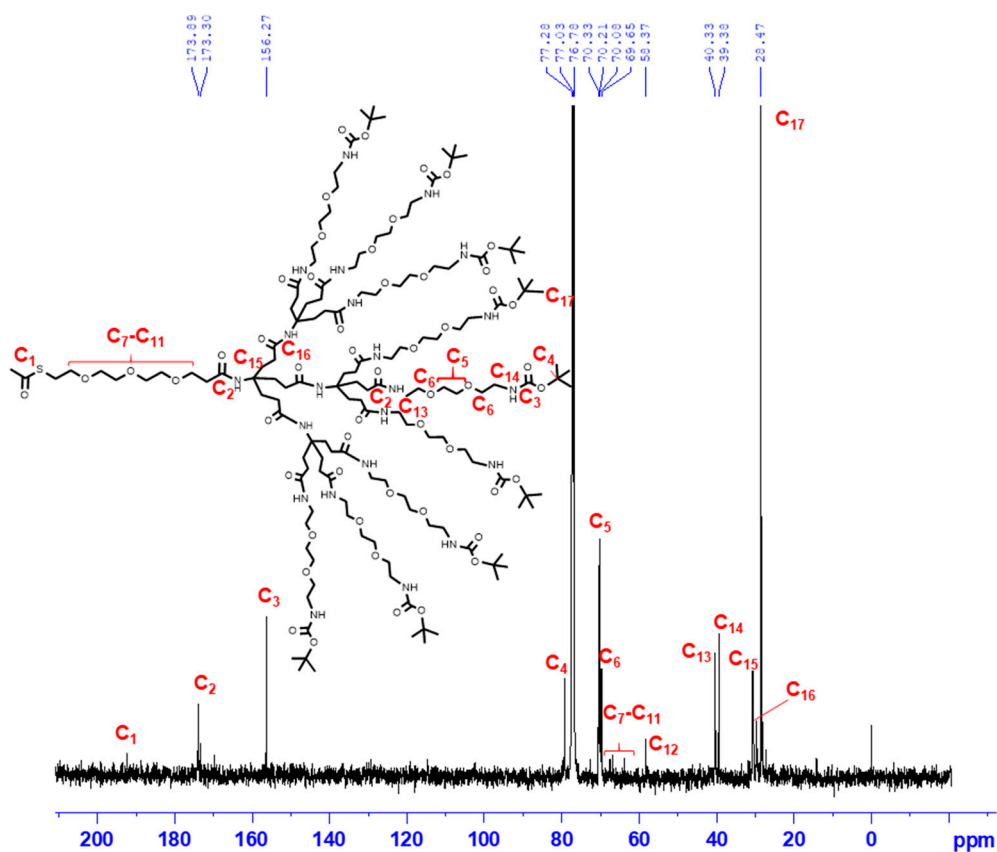

**Figure S26.**  $^{13}\text{C}$  NMR spectrum of compound **10** (600 MHz,  $\text{CDCl}_3$ , 25  $^\circ\text{C}$ ).

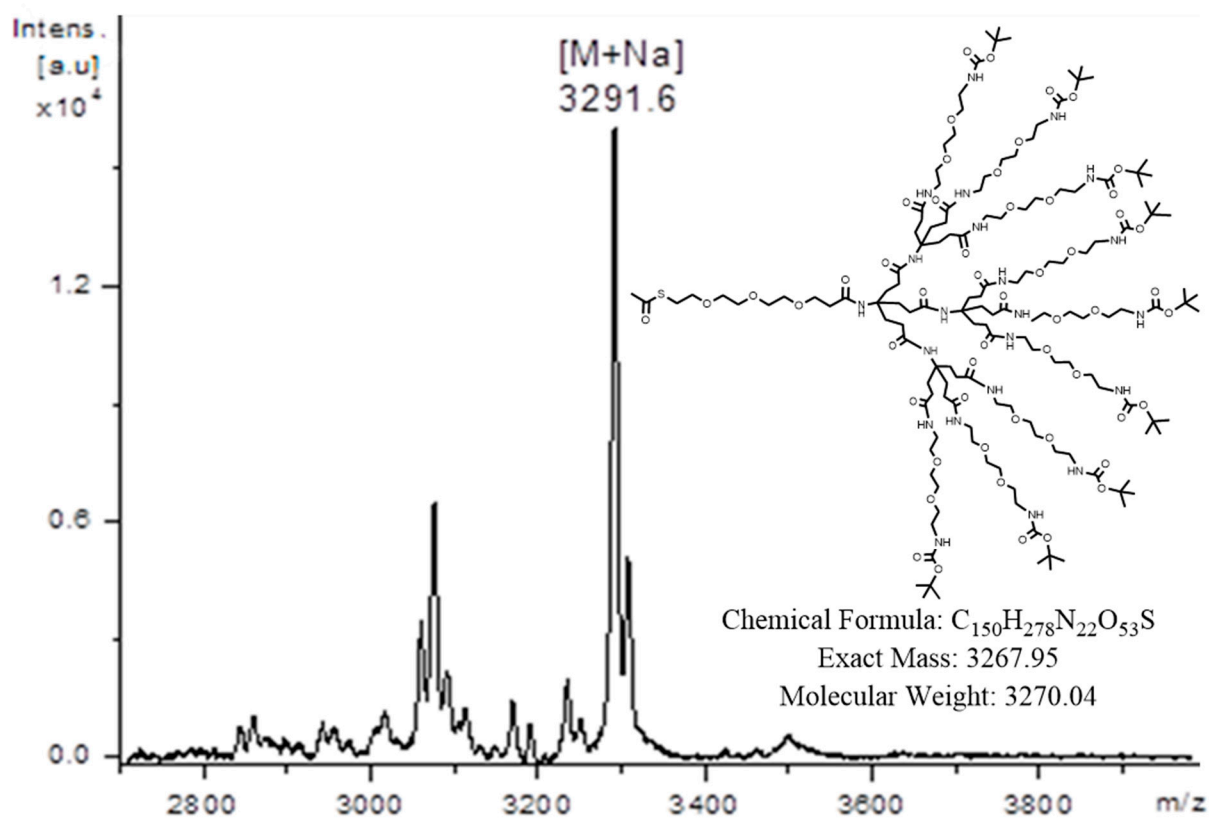

**Figure S27.** ESI-QTOF mass spectrum of compound **10**.

## 1.11. Compound 11

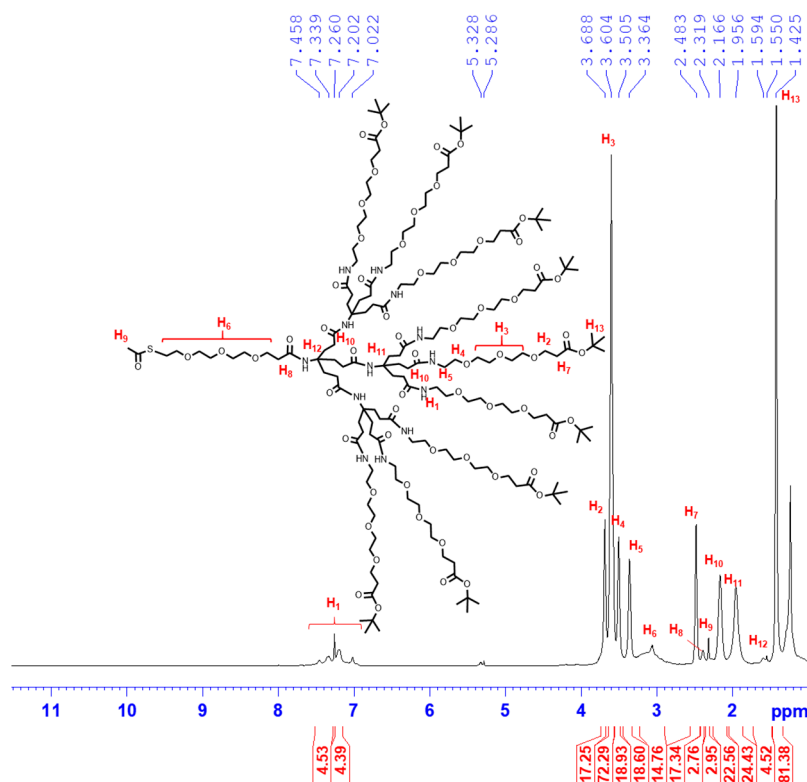

**Figure S28.** <sup>1</sup>H NMR spectrum of compound 11 (600 MHz, CDCl<sub>3</sub>, 25 °C).

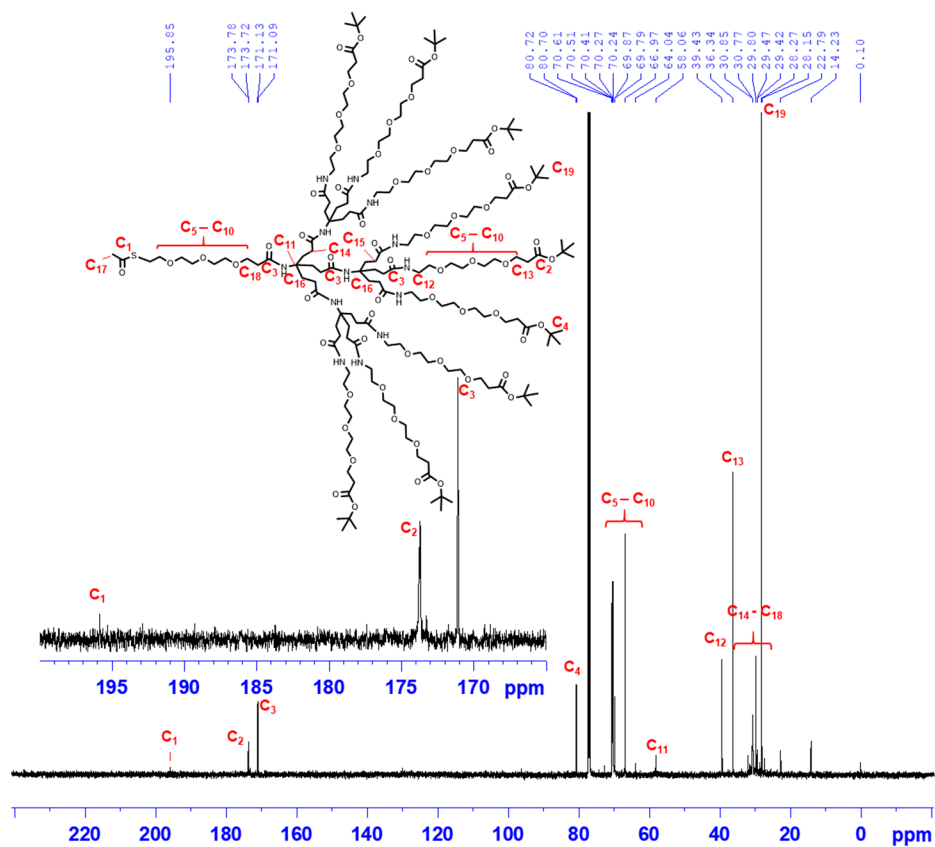

**Figure S29.** <sup>13</sup>C NMR spectrum of compound 11 (600 MHz, CDCl<sub>3</sub>, 25 °C).



## 1.12. Compound 12

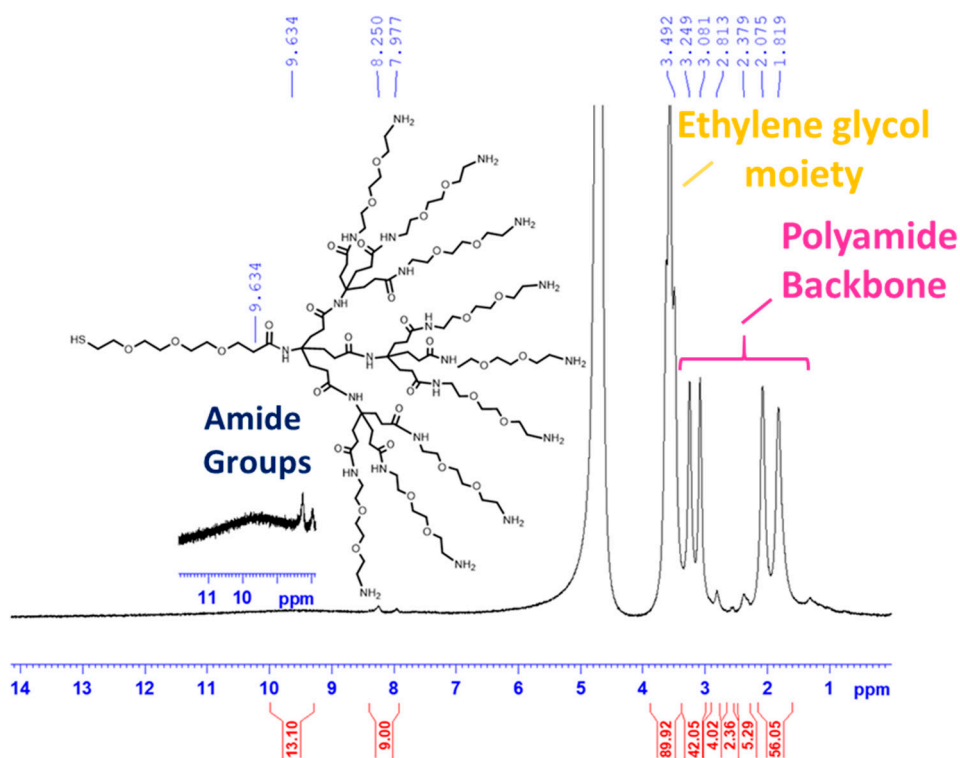

**Figure S30.** <sup>1</sup>H NMR spectrum of compound **12** (600 MHz, D<sub>2</sub>O, 25 °C).

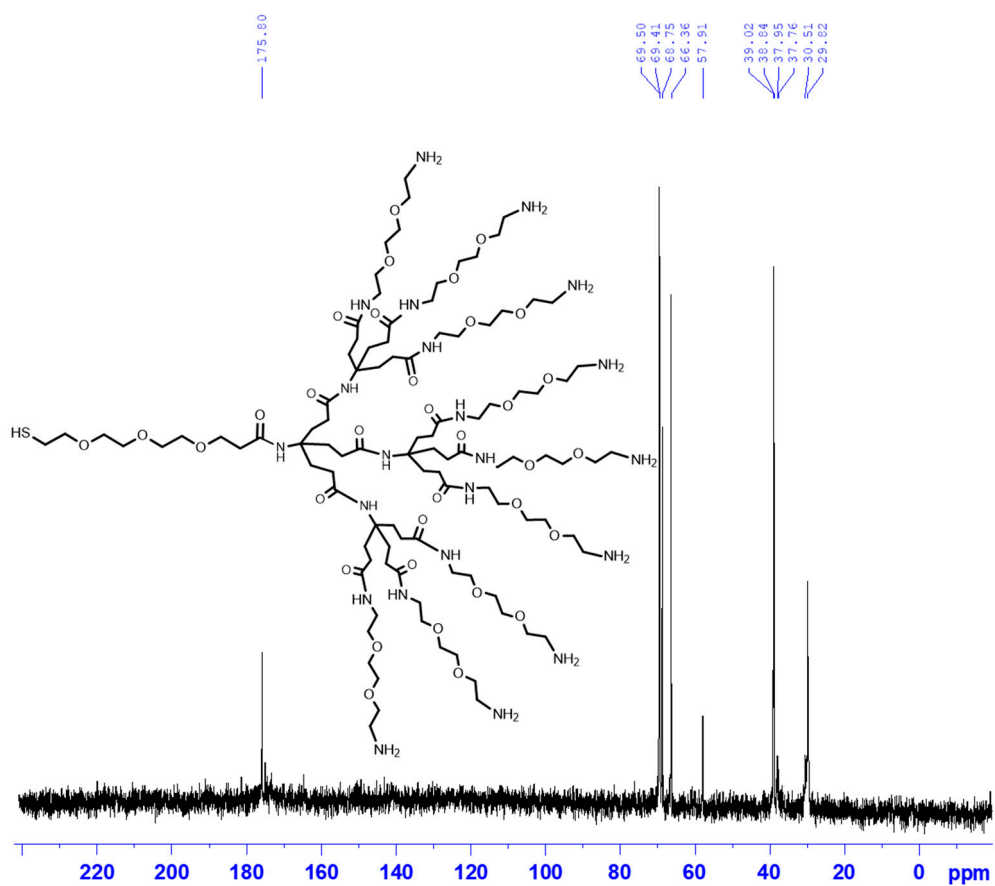

**Figure S31.** <sup>13</sup>C NMR spectrum of compound **12** (600 MHz, D<sub>2</sub>O, 25 °C).



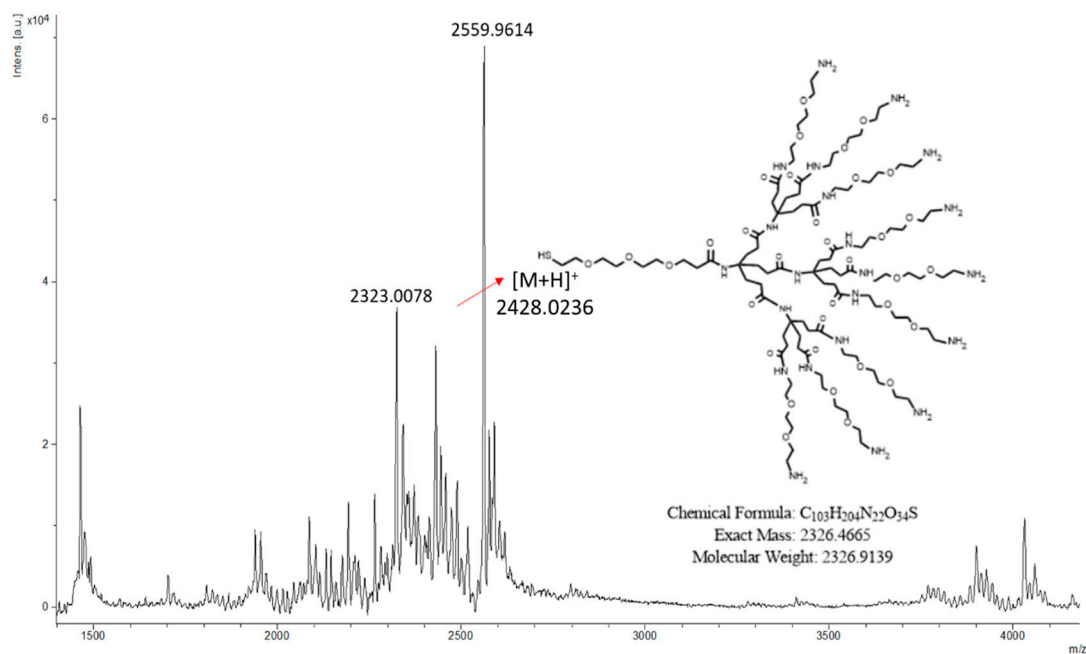

**Figure S32.** MALDI-TOF mass spectrum of compound **12**.

### 1.13. Compound 13

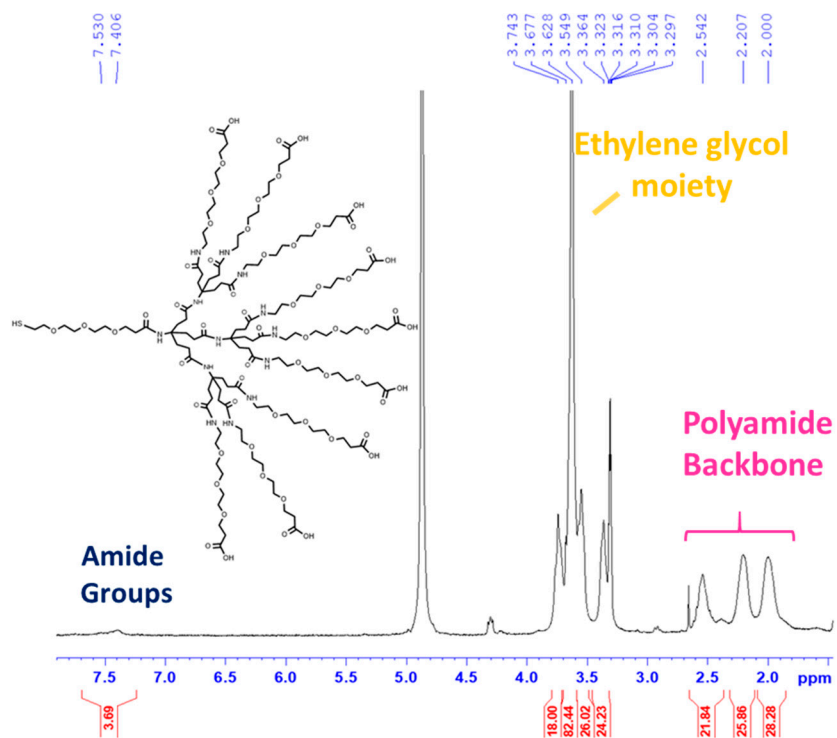

**Figure S33.**  $^1\text{H}$  NMR spectrum of compound **13** (600 MHz,  $\text{D}_2\text{O}$ , 25  $^\circ\text{C}$ ).

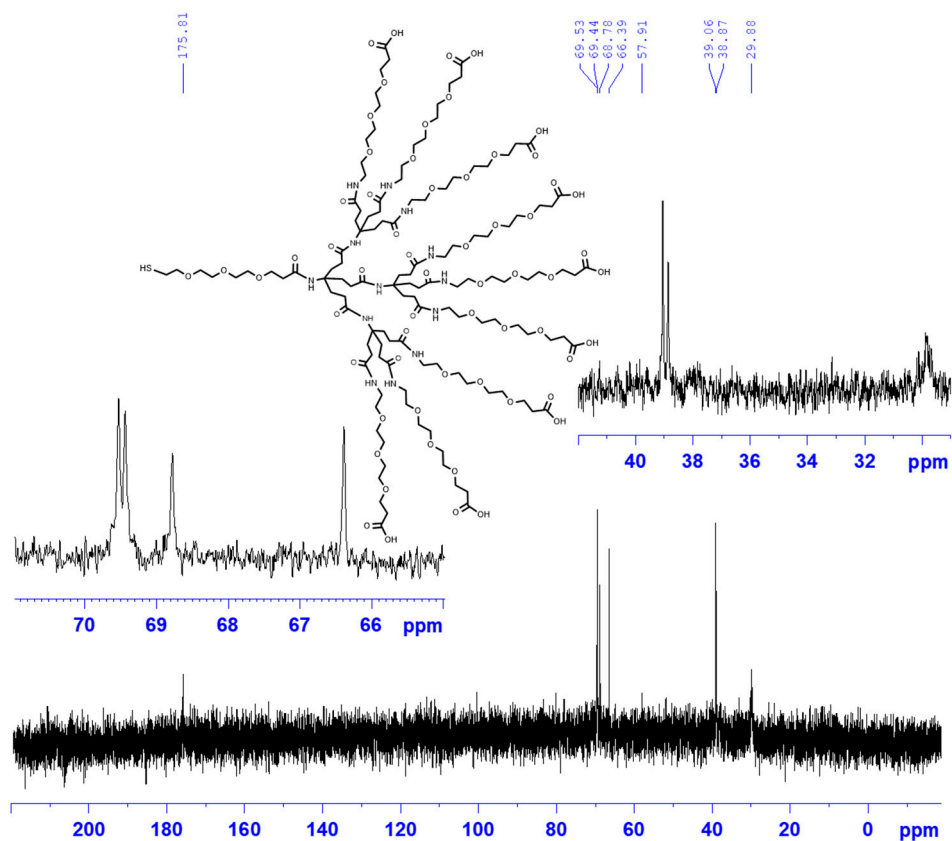

**Figure S34.** <sup>13</sup>C NMR spectrum of compound **13** (600 MHz, D<sub>2</sub>O, 25 °C).

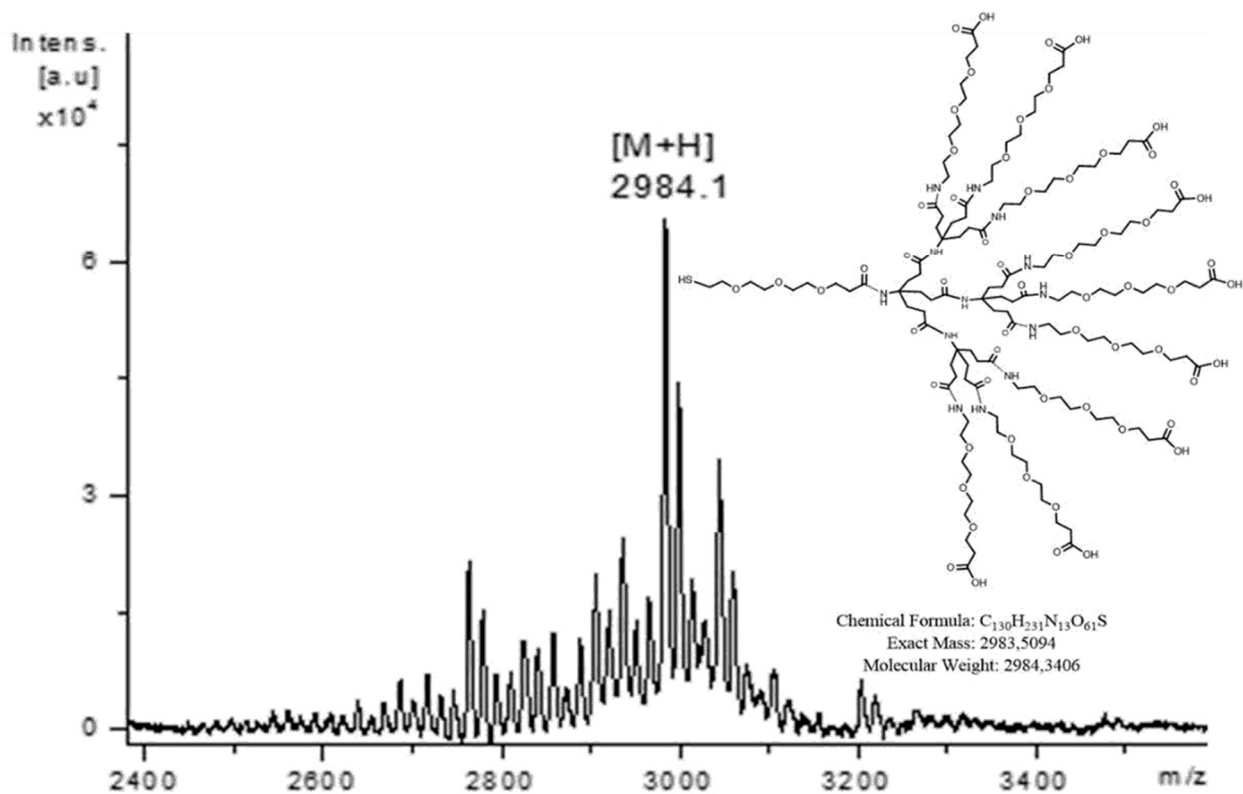

**Figure S35.** MALDI-TOF mass spectrum of compound **13** (600 MHz, D<sub>2</sub>O, 25 °C).
